# Supplementary material
Source: PubMed Central journal article supplement (PMC1959464)

**central****side****A**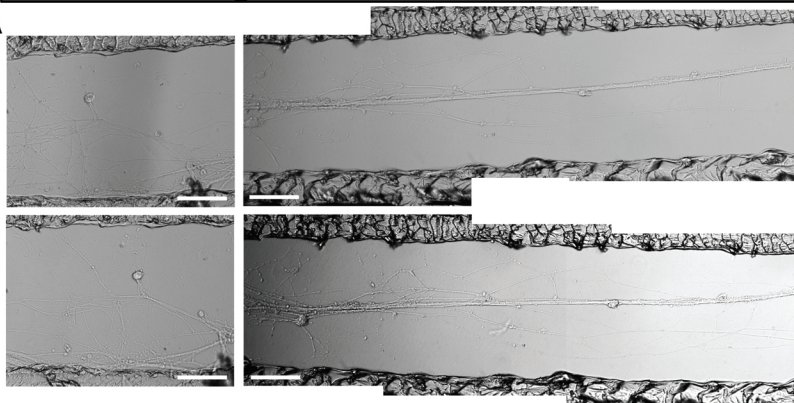**B****-Colch (side)****+Colch (side)**

BF

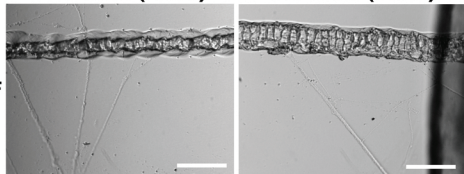

GAP43

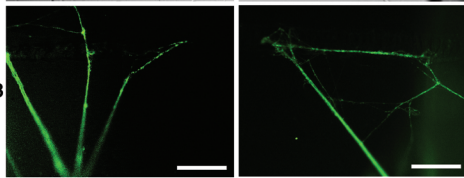**C**

The number of cells / ml

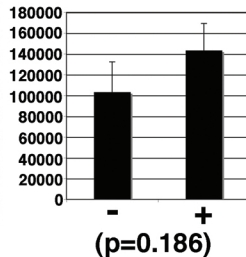

Supplement: pnas_0703805104_1.pdf [file pnas_0703805104_1.pdf]
